# Supplementary material for: Reproducible fiber optofluidic laser for disposable and array applications
Source: Royal Society of Chemistry journal article supplement (doi:10.1039/c7lc00708f), 2017-01-01
Supplement: c7lc00708f1.pdf [file c7lc00708f1.pdf]

Supplementary materials for

**Reproducible fiber optofluidic laser for disposable and array applications**

Chaoyang Gong,<sup>a</sup> Yuan Gong,<sup>\*ab</sup> Qiushu Chen,<sup>b</sup> Yunjiang Rao,<sup>a</sup> Gang-Ding Peng,<sup>c</sup>

and Xudong Fan<sup>\*b</sup>

<sup>a</sup> Key Laboratory of Optical Fiber Sensing and Communications (Ministry of Education of China), University of Electronic Science and Technology of China, No. 2006, Xiyuan Ave., Chengdu, 611731 China.

<sup>b</sup> Department of Biomedical Engineering, University of Michigan, 1101 Beal Ave., Ann Arbor, MI, 48109, USA.

<sup>c</sup> School of Electrical Engineering and Telecommunications, University of New South Wales, Sydney, NSW 2052, Australia.

E-mails: [ygong@uestc.edu.cn](mailto:ygong@uestc.edu.cn); [xsfan@umich.edu](mailto:xsfan@umich.edu)

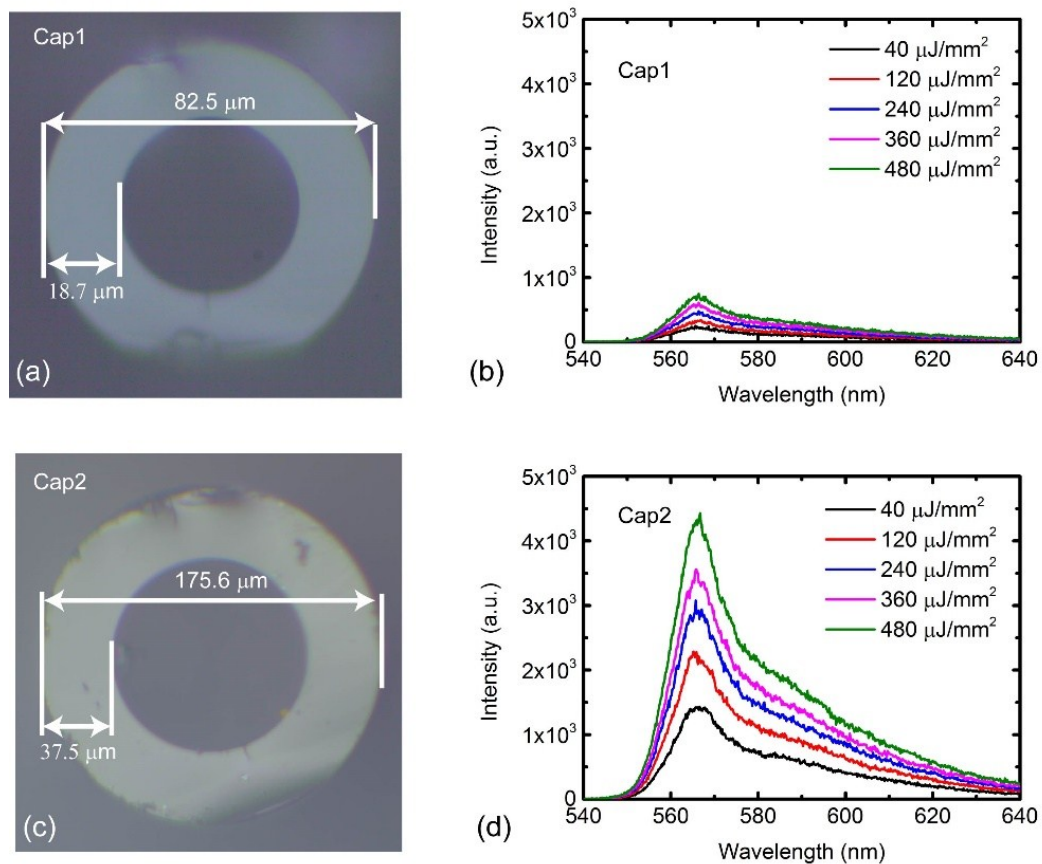

Figure S1 The microscopic images of two thinnest commercial capillaries from Vitrocom, (a) Cap1: Model 0508Q and (c) Cap2: Model 1017Q, with thickness of 18.7 μm and 37.5 μm, respectively. Corresponding emission spectra from (b) Cap1 and (d) Cap2 by using 1 mM R6G in ethanol as gain medium and pumping with a 532 nm pulsed laser; pump energy densities are also given. Not only a poor reproducibility in diameter (~ 10% fluctuation) was given by the manufacturer, but also no lasing was observed with pump as high as 480 μJ/mm<sup>2</sup>.

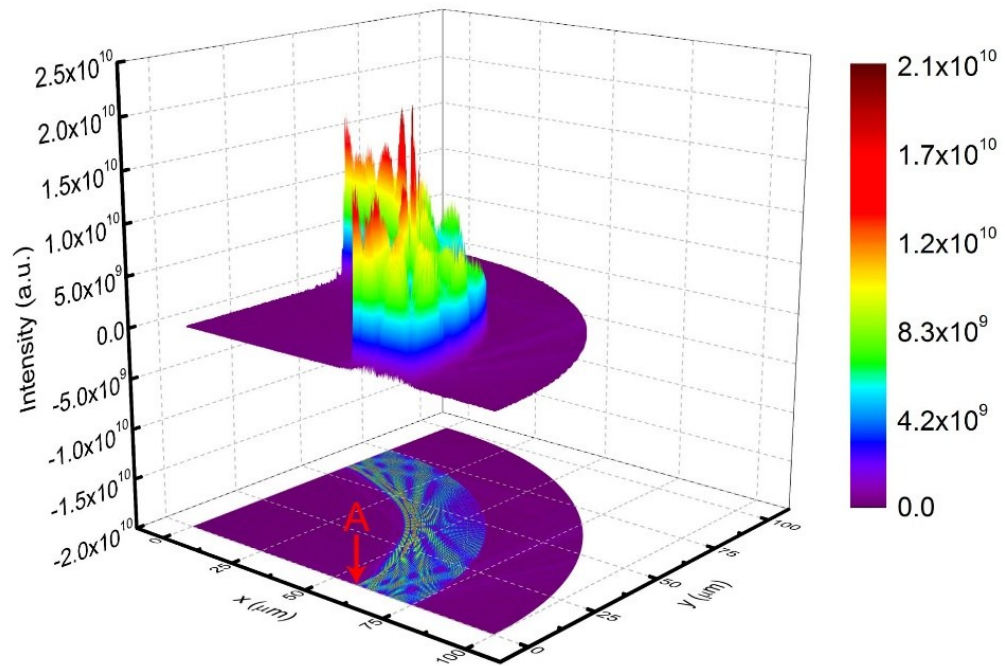

Figure S2 The intensity distribution in one quarter of the cross-section of MOF. The light source was located at A ( $x=57.5 \mu\text{m}$ ,  $y=0 \mu\text{m}$ ). Strong resonances and multi-modes of light were observed.

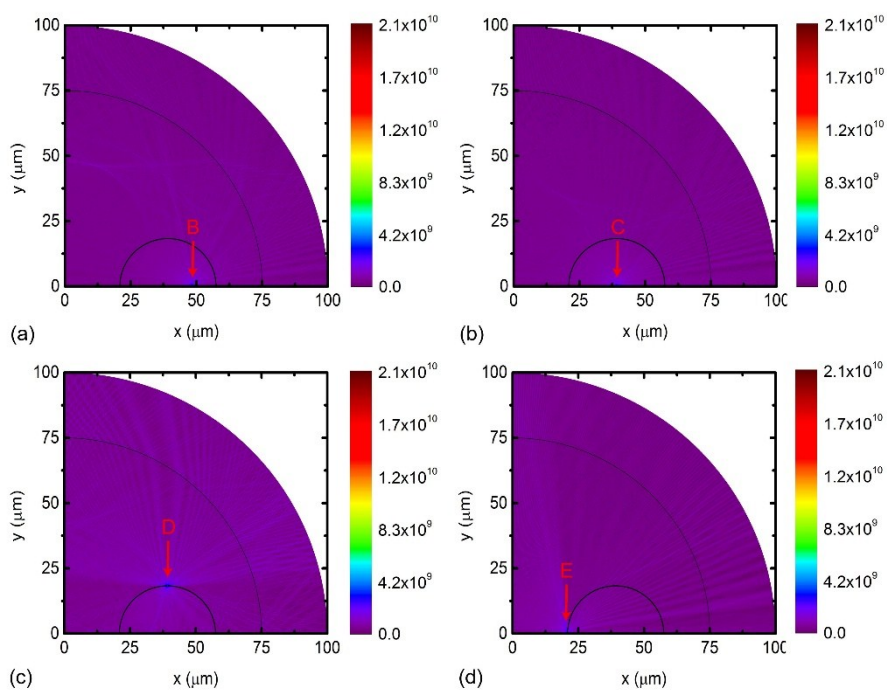

Figure S3 The intensity distribution in one quarter of the cross-section of MOF when the light source was located at (a) B ( $x = 48.35 \mu\text{m}$ ,  $y = 0 \mu\text{m}$ ), (b) C ( $x = 39.2 \mu\text{m}$ ,  $y = 0 \mu\text{m}$ ), (c) D ( $x = 39.2 \mu\text{m}$ ,  $y = 18.3 \mu\text{m}$ ), (d) E ( $x = 20.9 \mu\text{m}$ ,  $y = 0 \mu\text{m}$ ). No resonances were observed.

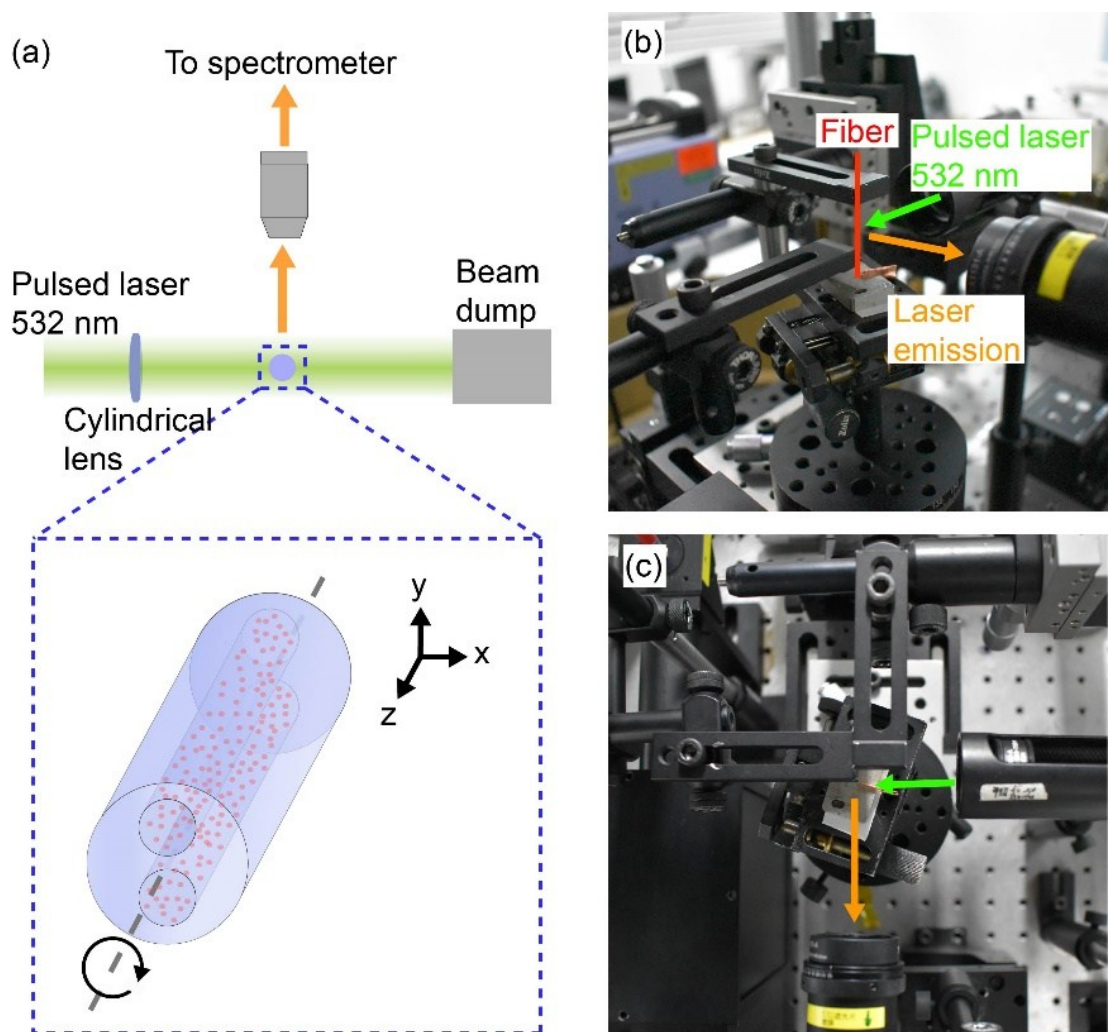

Figure S4 (a) Schematic diagram and (b)-(c) photos of the experimental setup, (b) side view and (c) top view.

### **Cost calculation for the disposable MOF**

The total cost for fabricating 3 km of MOF is <\$2600, including <\$100 for a section of silica rod which is sufficient for 3km MOF, <\$1500 for hole drilling and processing of the rod, and <\$1000 for the MOF drawing. The MOF can be made with cost lower than 1\$ per meter. Therefore, the cost of a 3-cm section of MOF is very low (<0.03 USD).

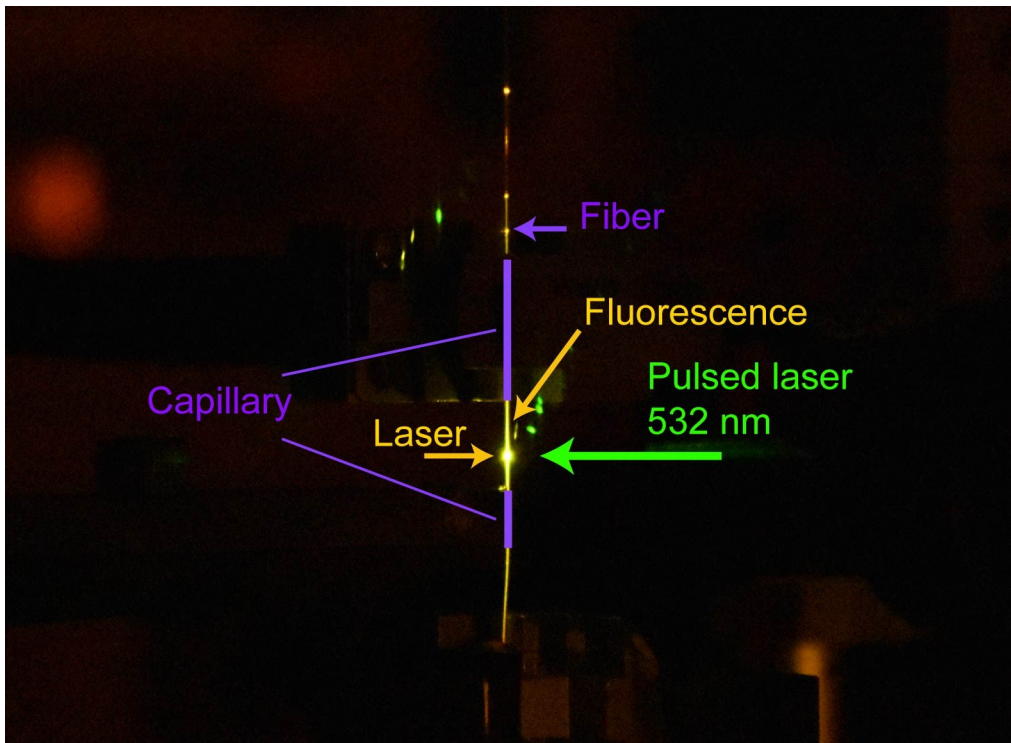

Figure S5 A photo of the fiber optofluidic laser.
